# Supplementary material
Source: PubMed Central journal article supplement (PMC5854832)
Supplement: MCB.00562-17_zmb999101725s1.pdf [file MCB.00562-17_zmb999101725s1.pdf]

## Supplemental Table S1

| qPCR primers                   |                                     |
|--------------------------------|-------------------------------------|
| <i>18S</i>                     | Forward: CGCCGCTAGAGGTGAAATTCT      |
|                                | Reverse: CATTCTTGGCAAATGCTTTCG      |
| <i>AdipoQ</i>                  | Forward: GCACTGGCAAGTTCTACTGCAA     |
|                                | Reverse: GTAGGTGAAGAGAACGGCCTTGT    |
| <i>Axin1</i>                   | Forward: AGCCACTAAGAGCTTCATAA       |
|                                | Reverse: TGAGCCTGTCCTTGTGTACT       |
| <i>Axin2</i>                   | Forward: TCTATAAGAGGTACATTGAGAACAA  |
|                                | Reverse: CAGAAGTCAAGAACACCTGGTAGGCA |
| <i>Cidea</i>                   | Forward: TGCTCTTCTGTATCGCCCAGT      |
|                                | Reverse: GCCGTGTTAAGGAATCTGCTG      |
| <i>Ctnnb1</i>                  | Forward: TGGCTGAACCATCACAGATGTTGAA  |
|                                | Reverse: TGGAACTTCCTTTTTGAAAGCTG    |
| <i>Dio1</i>                    | Forward: TCAGGACAGAAGTGCAACATCTGGGA |
|                                | Reverse: TGTGGCGTGAGCTTCTTCAATGTAA  |
| <i>Dio2</i>                    | Forward: AGAGTGGAGGCGCATGCT         |
|                                | Reverse: GGCATCTAGGAGGAAGCTGTT      |
| <i>Fabp4</i>                   | Forward: ATGATCATCAGCGTAAATGG       |
|                                | Reverse: TCCATCCACTTCTGCACCT        |
| <i>Fndc5</i>                   | Forward: AGCTGGGATGTCCTGGAGGA       |
|                                | Reverse: GCACATGGACGATATATTCT       |
| <i>Gprc6a</i>                  | Forward: AATATCAGTGTTCCTTCAAACCTCT  |
|                                | Reverse: ACAGTTTCTCTAGAGCAGTTGAAT   |
| <i>Lef1</i>                    | Forward: ACAGGAGCACCCCCACACGGACAGTG |
|                                | Reverse: ATAGCTGCACTCTCCTTTAGCGTGCA |
| <i>Lrp5</i>                    | Forward: CCAACTATCAATGTCCACCGGCT    |
|                                | Reverse: CCTCCCGCTCTGTGCCATCCAGGGA  |
| <i>Lrp6</i>                    | Forward: GGCTTGAGAAAAATTGTAAGGACA   |
|                                | Reverse: ACGTTCTATCTTTGGCACTTCTCCCC |
| <i>Myo6</i>                    | Forward: ATCAGCTACATTGAGCGTCTACA    |
|                                | Reverse: CCTGGAATGATCCGAAACACTTG    |
| <i>MyoG</i>                    | Forward: AGCGCAGGCTCAAGAAAGTGAATG   |
|                                | Reverse: CTGTAGGCGCTCAATGTAAGGAT    |
| <i>Osteocalcin</i>             | Forward: CTTTATGTCCAAGCAGGAGG       |
|                                | Reverse: TTCAAGCCATACTGGTCTGA       |
| <i>Pdk4</i>                    | Forward: TGGCTCAAGGCATCCTGGAGTATAAA |
|                                | Reverse: TACTTCCAATGTGGCTTGGGTTTCCC |
| <i>Pgc1<math>\alpha</math></i> | Forward: CCCTGCCATTGTTAAGAC         |
|                                | Reverse: TGCTGCTGTTCTGTTTTC         |
| <i>Ppar<math>\gamma</math></i> | Forward: AGATGACAGTGACTTGGCTA       |
|                                | Reverse: GAACAGCTGAGAGGACTCTG       |

|                               |                                      |
|-------------------------------|--------------------------------------|
| <i>Prdm16</i>                 | Forward: TGGCCTTCATCACCTCTCTGAA      |
|                               | Reverse: TTTCTGATCCACGGCTCCTGTGA     |
| <i>Ptprv</i>                  | Forward: CTCATGGAGCGATGCCTCTGGGGAT   |
|                               | Reverse: GATAACCTCCAAGACATACTGACT    |
| <i>Tcf7</i>                   | Forward: TGATAGAAACCTGAAAACACAGGCAGA |
|                               | Reverse: TGCCACCTGCGACCCAGGATCTGGT   |
| <i>Tcf7l1</i>                 | Forward: TCATCCATCTGAGCTGTCACCGTATT  |
|                               | Reverse: GAGACCAGGCTGGACATTGAAGCGT   |
| <i>Tcf7l2</i>                 | Forward: GTAGACCCCAAACAGGAATCCAAG    |
|                               | Reverse: CGCTGTGGGGTAGGGGTGTCTGAAT   |
| <i>Ucp1</i>                   | Forward: CCAGGCTTCCAGTACCATTA        |
|                               | Reverse: AGAAGTACTCTTGGACTGAG        |
| <i>Wnt1</i>                   | Forward: CACAACAACGAGGCAGGGCGAACGA   |
|                               | Reverse: AGGACGCGGGAGGCGCCGTCGAAGCG  |
| <i>Wnt3a</i>                  | Forward: AGTATGACAGTGCCTCGGAGATGGTG  |
|                               | Reverse: CAGGTGCGGTACGCGTCCCGAAGGA   |
| <i>Wnt5a</i>                  | Forward: CACGCATCCTCATGAACTTACACAA   |
|                               | Reverse: TTGAGGGCATCGCCACCTTCCGGA    |
| <i>Wnt10b</i>                 | Forward: CACGACATGGACTTCGGAGAGAAGTT  |
|                               | Reverse: TGGCAGCTGCCTGACGTTCCATGGCA  |
| <i>Wnt11</i>                  | Forward: CTCCTATGAAGGTGAAAAAACAGGA   |
|                               | Reverse: ACGTCCTGGAGCTCTTGACGCCCT    |
| <i>Gprc6a (Rat)</i>           | Forward: TAAGGAGCACGATGTGCTTCGAGAAG  |
|                               | Reverse: AACAGACCACTAATCCCCCAGATGA   |
| <i>Tcf7 (Rat)</i>             | Forward: AGAAGAGCAAGCCAAGTACTATGAG   |
|                               | Reverse: GGCCAAAGCGAGCACGACATTTCT    |
| <b>Chip qPCR primers</b>      |                                      |
| <i>Gprc6a-promoter</i>        | Forward: TGTGATTGGTTACCTCACTCAGGA    |
|                               | Reverse: AGAAGGGCACATGCTCCACTATGTTCA |
| <i>Ucp1-promoter-0.6Kb</i>    | Forward: TCTGTCTTCCAGGGCTCCTG        |
|                               | Reverse: TTCAAATGTCACCTTCAGATTT      |
| <i>Ucp1-promoter-2.0Kb</i>    | Forward: ATACCATCCTCAAGGGCATTG       |
|                               | Reverse: AGCACAGCCGGATTGAAAGGA       |
| <i>Ucp1-promoter-6.0Kb</i>    | Forward: AAATCAGTGAGAAATCCAAAGGGCTTT |
|                               | Reverse: GGTCAAAAATCTTTGTTTCCATACAC  |
| <b>siRNA target sequences</b> |                                      |
| <i>Gprc6a</i>                 | CACCTAGTGTGGAAGAGAA                  |
| <i>Tcf7</i>                   | GAGCCAAGGTCATTGCTGA                  |
